# Supplementary material
Source: PubMed Central journal article supplement (PMC3028452)
Supplement: supp_93_3_241__1.pdf [file supp_93_3_241__1.pdf]

TABLE E-1 Population Characteristics of the Michigan Site Study of Women's Health Across the Nation (SWAN) Cohort and Participation Information for Follow-up Visit 11 When Knees Were Evaluated with Magnetic Resonance Imaging

|                                                                                               | Overall  | African-American | Caucasian |
|-----------------------------------------------------------------------------------------------|----------|------------------|-----------|
| No. (%) of participants at baseline (1996-1997)                                               | 543      | 325 (60)         | 218 (40)  |
| No. deceased at follow-up visit 11                                                            | 18       | 11               | 7         |
| No. (%) available for site-specific follow-up visit 11                                        | 442 (81) | 266 (82)         | 176 (81)  |
| No. (%) of available participants who completed the site-specific follow-up visit-11 protocol | 419 (95) | 253 (95)         | 166 (94)  |
| No. (%) who completed follow-up visit-11 protocol including knee MRI                          | 363 (82) | 226 (85)         | 137 (78)  |
| No. (%) who completed follow-up visit-11 protocol but not knee MRI                            | 29 (6)   | 15 (5)           | 14 (8)    |
| No. (%) who completed brief interview protocol                                                | 27 (6)   | 12 (5)           | 15 (9)    |

TABLE E-2 Right Knee Pain (in the Last Month at the Time of Follow-up Visit 11) or Any Knee Injury (in the Last Year at the Time of Follow-up Visit 11) Associated with the Three-Level Kellgren-Lawrence Score and Magnetic Resonance Imaging Features\*

|                         | Right Knee Pain in Last Month    | Knee Injury in Last Year          |
|-------------------------|----------------------------------|-----------------------------------|
|                         | Odds Ratio (95% CI)              | Odds Ratio (95% CI)               |
| Kellgren-Lawrence score |                                  |                                   |
| 0, 1                    | Reference category               | Reference category                |
| 2                       | 1.64 (0.94, 2.86)                | 3.66 (0.70, 19.21)                |
| 3, 4                    | 11.27 (6.23, 20.41) <sup>†</sup> | 5.86 (1.16, 29.65) <sup>‡</sup>   |
| Cartilage               |                                  |                                   |
| Medial femoral condyle  |                                  |                                   |
| No cartilage defect     | Reference category               | Reference category                |
| Cartilage defect ≤99%   | 1.55 (0.82, 2.93)                | 2.06 (0.25, 16.99)                |
| Cartilage defect 100%   | 6.31 (2.80, 14.26) <sup>†</sup>  | 2.94 (0.26, 33.31)                |
| Medial tibial plateau   |                                  |                                   |
| No cartilage defect     | Reference category               | Reference category                |
| Cartilage defect ≤99%   | 1.76 (1.06, 2.94) <sup>‡</sup>   | 2.51 (0.52, 11.99)                |
| Cartilage defect 100%   | 9.19 (3.68, 22.97) <sup>†</sup>  | –                                 |
| Lateral femoral condyle |                                  |                                   |
| No cartilage defect     | Reference category               | Reference category                |
| Cartilage defect ≤99%   | 1.20 (0.73, 1.96)                | 1.62 (0.32, 8.17)                 |
| Cartilage defect 100%   | 19.77 (4.29, 91.20) <sup>†</sup> | 7.87 (1.03, 60.03) <sup>‡</sup>   |
| Lateral tibial plateau  |                                  |                                   |
| No cartilage defect     | Reference category               | Reference category                |
| Cartilage defect ≤99%   | 1.67 (1.05, 2.65) <sup>‡</sup>   | 3.65 (0.70, 19.08)                |
| Cartilage defect 100%   | 13.46 (3.72, 48.71) <sup>†</sup> | 21.43 (3.30, 138.96) <sup>†</sup> |
| Medial patella          |                                  |                                   |
| No cartilage defect     | Reference category               | Reference category                |
| Cartilage defect ≤99%   | 1.21 (0.64, 2.28)                | 1.75 (0.21, 14.51)                |
| Cartilage defect 100%   | 2.15 (1.01, 4.59) <sup>‡</sup>   | 1.90 (0.17, 21.54)                |
| Lateral patella         |                                  |                                   |
| No cartilage defect     | Reference category               | Reference category                |
| Cartilage defect ≤99%   | 2.36 (1.44, 3.89) <sup>†</sup>   | 1.36 (0.32, 5.78)                 |
| Cartilage defect 100%   | 2.82 (1.33, 5.95) <sup>†</sup>   | 2.54 (0.41, 15.77)                |
| Osteophyte              |                                  |                                   |
| Medial compartment      |                                  |                                   |
| No osteophytes          | Reference category               | Reference category                |
| Osteophyte ≤5 mm        | 2.54 (1.48, 4.35) <sup>†</sup>   | 5.55 (0.64, 48.06)                |
| Osteophyte >5 mm        | 7.65 (4.00, 14.63) <sup>†</sup>  | 9.81 (1.07, 89.47) <sup>‡</sup>   |
| Lateral compartment     |                                  |                                   |
| No osteophytes          | Reference category               | Reference category                |
| Osteophyte ≤5 mm        | 2.43 (1.42, 4.16) <sup>†</sup>   | 1.40 (0.23, 8.51)                 |
| Osteophyte >5 mm        | 6.58 (3.42, 12.67) <sup>†</sup>  | 5.98 (1.13, 31.67) <sup>‡</sup>   |

|                                         |                      |                     |
|-----------------------------------------|----------------------|---------------------|
| Meniscal abnormalities                  |                      |                     |
| Medial compartment                      |                      |                     |
| Normal, no tear                         | Reference category   | Reference category  |
| Intrasubstance meniscal abnormality     | 1.69 (0.82, 3.47)    | 2.10 (0.25, 17.38)  |
| Nondisplaced or displaced meniscal tear | 4.75 (2.20, 10.23)†  | 1.27 (0.11, 14.30)  |
| Lateral compartment                     |                      |                     |
| Normal, no tear                         | Reference category   | Reference category  |
| Intrasubstance meniscal abnormality     | 1.85 (1.05, 3.25)‡   | 1.20 (0.22, 6.68)   |
| Nondisplaced or displaced meniscal tear | 4.45 (2.28, 8.67)†   | 3.34 (0.60, 18.77)  |
| Bone marrow edema§                      |                      |                     |
| Medial femoral condyle                  |                      |                     |
| Normal, no BME                          | Reference category   | Reference category  |
| Small BME (<1 cm)                       | 5.61 (2.64, 11.94)†  | 1.01 (0.12, 8.21)   |
| Large or very large BME (≥1 cm)         | 4.29 (1.00, 18.32)‡  | –                   |
| Medial tibial plateau                   |                      |                     |
| Normal, no BME                          | Reference category   | Reference category  |
| Small BME (<1 cm)                       | 2.23 (1.20, 4.14)‡   | 1.61 (0.33, 7.84)   |
| Large or very large BME (≥1 cm)         | 7.28 (1.44, 36.76)‡  | –                   |
| Lateral femoral condyle                 |                      |                     |
| Normal, no BME                          | Reference category   | Reference category  |
| Small BME (<1 cm)                       | 3.43 (1.36, 8.64)†   | 1.91 (0.23, 15.84)  |
| Large or very large BME (≥1 cm)         | 4.57 (0.82, 25.34)   | –                   |
| Lateral tibial plateau                  |                      |                     |
| Normal, no BME                          | Reference category   | Reference category  |
| Small BME (<1 cm)                       | 3.04 (1.56, 5.94)†   | 4.16 (1.00, 17.34)  |
| Large or very large BME (≥1 cm)         | 14.93 (1.77, 125.8)‡ | 8.56 (0.89, 82.48)  |
| Medial patella                          |                      |                     |
| Normal, no BME                          | Reference category   | Reference category  |
| Small BME (<1 cm)                       | 1.18 (0.73, 1.91)    | 0.28 (0.03, 2.20)   |
| Large or very large BME (≥1 cm)         | –                    | –                   |
| Lateral patella                         |                      |                     |
| Normal, no BME                          | Reference category   | Reference category  |
| Small BME (<1 cm)                       | 1.75 (1.06, 2.90)‡   | 0.79 (0.16, 3.80)   |
| Large or very large BME (≥1 cm)         | 1.59 (0.26, 9.71)    | –                   |
| Baker cyst                              |                      |                     |
| Normal, no Baker cyst                   | Reference category   | Reference category  |
| Small Baker cyst                        | 1.39 (0.86, 2.26)    | 8.68 (1.77, 42.52)† |
| Large Baker cyst                        | 1.14 (0.41, 3.17)    | 7.00 (0.60, 81.15)  |
| Effusion                                |                      |                     |
| Normal, physiological fluid             | Reference category   | Reference category  |
| Small effusion (≤10 mm)                 | 1.32 (0.79, 2.21)    | –                   |
| Moderate or large effusion (>10 mm)     | 6.44 (2.72, 15.25)†  | –                   |
| Synovitis                               |                      |                     |
| Normal, no synovitis                    | Reference category   | Reference category  |

|                              |                     |                    |
|------------------------------|---------------------|--------------------|
| Mild synovitis               | 3.19 (1.81, 5.61)†  | 2.23 (0.54, 9.15)  |
| Moderate to marked synovitis | 4.35 (1.87, 10.13)† | 1.85 (0.21, 16.04) |

\*Anterior cruciate ligament, medial collateral ligament, lateral collateral ligament, and subchondral cysts are not included in table because they were not significantly associated with knee pain or knee injury. All models are unadjusted. †p < 0.01. ‡p < 0.05. §BME = bone marrow edema.

Michigan SWAN  
Strength & Functioning  
Study

**KNEE MRI DATA COLLECTION FORM**

**SWAN ID:** \_\_\_\_\_ **MRN:** \_\_\_\_\_

**DATE OF MRI:** \_\_\_\_/\_\_\_\_/\_\_\_\_ **HOSPITAL:** UM SJMHS

**KNEE:** RIGHT LEFT **RADIOLOGIST:** \_\_\_\_\_

**DATE OF MRI READ:** \_\_\_\_/\_\_\_\_/\_\_\_\_ **TIME OF MRI READ:** \_\_\_\_ : \_\_\_\_ AM/PM

| Site              | Cartilage                |                          |                          |                          |                          |                          | BME                      |                          |                          |                          |                          |                          |                          |
|-------------------|--------------------------|--------------------------|--------------------------|--------------------------|--------------------------|--------------------------|--------------------------|--------------------------|--------------------------|--------------------------|--------------------------|--------------------------|--------------------------|
|                   | 0                        | 1                        | 2                        | 3                        | 4                        | 5                        | 0                        | 0.5                      | 1                        | 1.5                      | 2                        | 2.5                      | 3                        |
| Med. Fem. Condyle | <input type="checkbox"/> | <input type="checkbox"/> | <input type="checkbox"/> | <input type="checkbox"/> | <input type="checkbox"/> | <input type="checkbox"/> | <input type="checkbox"/> | <input type="checkbox"/> | <input type="checkbox"/> | <input type="checkbox"/> | <input type="checkbox"/> | <input type="checkbox"/> | <input type="checkbox"/> |
| Med. Tib. Plateau | <input type="checkbox"/> | <input type="checkbox"/> | <input type="checkbox"/> | <input type="checkbox"/> | <input type="checkbox"/> | <input type="checkbox"/> | <input type="checkbox"/> | <input type="checkbox"/> | <input type="checkbox"/> | <input type="checkbox"/> | <input type="checkbox"/> | <input type="checkbox"/> | <input type="checkbox"/> |
| Lat. Fem. Condyle | <input type="checkbox"/> | <input type="checkbox"/> | <input type="checkbox"/> | <input type="checkbox"/> | <input type="checkbox"/> | <input type="checkbox"/> | <input type="checkbox"/> | <input type="checkbox"/> | <input type="checkbox"/> | <input type="checkbox"/> | <input type="checkbox"/> | <input type="checkbox"/> | <input type="checkbox"/> |
| Lat. Tib. Plateau | <input type="checkbox"/> | <input type="checkbox"/> | <input type="checkbox"/> | <input type="checkbox"/> | <input type="checkbox"/> | <input type="checkbox"/> | <input type="checkbox"/> | <input type="checkbox"/> | <input type="checkbox"/> | <input type="checkbox"/> | <input type="checkbox"/> | <input type="checkbox"/> | <input type="checkbox"/> |
| Trochlea          | <input type="checkbox"/> | <input type="checkbox"/> | <input type="checkbox"/> | <input type="checkbox"/> | <input type="checkbox"/> | <input type="checkbox"/> | <input type="checkbox"/> | <input type="checkbox"/> | <input type="checkbox"/> | <input type="checkbox"/> | <input type="checkbox"/> | <input type="checkbox"/> | <input type="checkbox"/> |
| Medial Patella    | <input type="checkbox"/> | <input type="checkbox"/> | <input type="checkbox"/> | <input type="checkbox"/> | <input type="checkbox"/> | <input type="checkbox"/> | <input type="checkbox"/> | <input type="checkbox"/> | <input type="checkbox"/> | <input type="checkbox"/> | <input type="checkbox"/> | <input type="checkbox"/> | <input type="checkbox"/> |
| Lateral Patella   | <input type="checkbox"/> | <input type="checkbox"/> | <input type="checkbox"/> | <input type="checkbox"/> | <input type="checkbox"/> | <input type="checkbox"/> | <input type="checkbox"/> | <input type="checkbox"/> | <input type="checkbox"/> | <input type="checkbox"/> | <input type="checkbox"/> | <input type="checkbox"/> | <input type="checkbox"/> |

**Associated findings:**

|               | Osteophyte               |                          |                          |                          |                          |                          |                          | Subchondral Cyst         |                          |                          | Meniscal Abnormalities   |                          |                          |                          |
|---------------|--------------------------|--------------------------|--------------------------|--------------------------|--------------------------|--------------------------|--------------------------|--------------------------|--------------------------|--------------------------|--------------------------|--------------------------|--------------------------|--------------------------|
|               | 0                        | 0.5                      | 1                        | 1.5                      | 2                        | 2.5                      | 3                        | 0                        | 1                        | 2                        | 0                        | 1                        | 2                        | 3                        |
| Medial Comp.  | <input type="checkbox"/> | <input type="checkbox"/> | <input type="checkbox"/> | <input type="checkbox"/> | <input type="checkbox"/> | <input type="checkbox"/> | <input type="checkbox"/> | <input type="checkbox"/> | <input type="checkbox"/> | <input type="checkbox"/> | <input type="checkbox"/> | <input type="checkbox"/> | <input type="checkbox"/> | <input type="checkbox"/> |
| Lateral Comp. | <input type="checkbox"/> | <input type="checkbox"/> | <input type="checkbox"/> | <input type="checkbox"/> | <input type="checkbox"/> | <input type="checkbox"/> | <input type="checkbox"/> | <input type="checkbox"/> | <input type="checkbox"/> | <input type="checkbox"/> | <input type="checkbox"/> | <input type="checkbox"/> | <input type="checkbox"/> | <input type="checkbox"/> |
| PF Comp.      | <input type="checkbox"/> | <input type="checkbox"/> | <input type="checkbox"/> | <input type="checkbox"/> | <input type="checkbox"/> | <input type="checkbox"/> | <input type="checkbox"/> | <input type="checkbox"/> | <input type="checkbox"/> | <input type="checkbox"/> |                          |                          |                          |                          |

|               | Meniscal Extrusion       |                          |                          |             |
|---------------|--------------------------|--------------------------|--------------------------|-------------|
|               | 0                        | 1                        | 2                        | Measurement |
| Medial Comp.  | <input type="checkbox"/> | <input type="checkbox"/> | <input type="checkbox"/> | mm          |
| Lateral Comp. | <input type="checkbox"/> | <input type="checkbox"/> | <input type="checkbox"/> | mm          |

**General findings:**

|             | 0                        | 1                        | 2                        |     | 0                        | 1                        | 2                        |     |                          | 0                        | 1                        | 2                        | 3                        |
|-------------|--------------------------|--------------------------|--------------------------|-----|--------------------------|--------------------------|--------------------------|-----|--------------------------|--------------------------|--------------------------|--------------------------|--------------------------|
| Effusion    | <input type="checkbox"/> | <input type="checkbox"/> | <input type="checkbox"/> | ACL | <input type="checkbox"/> | <input type="checkbox"/> | <input type="checkbox"/> | MCL | <input type="checkbox"/> | <input type="checkbox"/> | <input type="checkbox"/> | <input type="checkbox"/> | <input type="checkbox"/> |
| Bakers cyst | <input type="checkbox"/> | <input type="checkbox"/> | <input type="checkbox"/> | PCL | <input type="checkbox"/> | <input type="checkbox"/> | <input type="checkbox"/> | LCL | <input type="checkbox"/> | <input type="checkbox"/> | <input type="checkbox"/> | <input type="checkbox"/> | <input type="checkbox"/> |
| Synovitis   | <input type="checkbox"/> | <input type="checkbox"/> | <input type="checkbox"/> |     |                          |                          |                          |     |                          |                          |                          |                          |                          |

Comments: \_\_\_\_\_  
 \_\_\_\_\_  
 \_\_\_\_\_

|                                                                                                                                                                                                                                                                                                     |   |                                                                   |
|-----------------------------------------------------------------------------------------------------------------------------------------------------------------------------------------------------------------------------------------------------------------------------------------------------|---|-------------------------------------------------------------------|
| <b><u>Cartilage.</u></b><br>Note: Ulceration is defined as a visible irregularity in the normal contour of the subchondral cortex. BME or subchondral sclerosis alone is not considered ulceration.                                                                                                 | 0 | Normal                                                            |
|                                                                                                                                                                                                                                                                                                     | 1 | Internal signal alteration only                                   |
|                                                                                                                                                                                                                                                                                                     | 2 | Defect <50%                                                       |
|                                                                                                                                                                                                                                                                                                     | 3 | Defect 50%-99%                                                    |
|                                                                                                                                                                                                                                                                                                     | 4 | 100% defect, no bone ulceration                                   |
| <b><u>BME.</u></b><br>Note: Measured perpendicular to adjacent articular surface.                                                                                                                                                                                                                   | 5 | 100% defect, with bone ulceration                                 |
|                                                                                                                                                                                                                                                                                                     | 0 | Normal                                                            |
|                                                                                                                                                                                                                                                                                                     | 1 | Small (largest diameter <1 cm)                                    |
|                                                                                                                                                                                                                                                                                                     | 2 | Large (largest diameter 1.01 – 2.0 cm)                            |
|                                                                                                                                                                                                                                                                                                     | 3 | Very large (largest diameter >2.0 cm)                             |
| <b><u>Osteophyte.</u></b><br>Note: Osteophytes are defined as any abnormal bone growth arising from the margin of the involved compartment.                                                                                                                                                         | 0 | No osteophyte                                                     |
|                                                                                                                                                                                                                                                                                                     | 1 | Osteophyte <5 mm                                                  |
|                                                                                                                                                                                                                                                                                                     | 2 | Osteophyte >5 mm to ≤10 mm                                        |
|                                                                                                                                                                                                                                                                                                     | 3 | Osteophyte >10 mm                                                 |
| <b><u>Subchondral Cyst.</u></b><br>Note: Subchondral cysts are defined as discrete, marginated circular or oval areas of hyperintensity on FSE PD FS images in a subchondral location. Cysts have sharp, smoothly circumscribed margins, typically with a hyperintensity similar to synovial fluid. | 0 | Normal                                                            |
|                                                                                                                                                                                                                                                                                                     | 1 | Small (<1 cm)                                                     |
|                                                                                                                                                                                                                                                                                                     | 2 | Large (>1 cm)                                                     |
| Meniscal Abnormalities                                                                                                                                                                                                                                                                              | 0 | Normal                                                            |
|                                                                                                                                                                                                                                                                                                     | 1 | Intrasubstance (Crues Grades 1 and 2) meniscal abnormality only   |
|                                                                                                                                                                                                                                                                                                     | 2 | Non-displaced tear (extending to meniscal surface, Crues Grade 3) |
|                                                                                                                                                                                                                                                                                                     | 3 | Displaced or macerated tears                                      |
| Meniscal Extrusion                                                                                                                                                                                                                                                                                  | 0 | None                                                              |
|                                                                                                                                                                                                                                                                                                     | 1 | <5 mm                                                             |
|                                                                                                                                                                                                                                                                                                     | 2 | >5 mm                                                             |
| <b><u>Effusion.</u></b><br>Note: Effusion is significantly greater than expected physiologic amounts of synovial fluid in the lateral or medial                                                                                                                                                     | 0 | Normal, physiologic fluid                                         |
|                                                                                                                                                                                                                                                                                                     | 1 | Small (<10 mm)                                                    |
|                                                                                                                                                                                                                                                                                                     | 2 | Moderate/large (>10 mm)                                           |

|                                                                                                                                                                                                                                                                                              |   |                                                                                                                            |
|----------------------------------------------------------------------------------------------------------------------------------------------------------------------------------------------------------------------------------------------------------------------------------------------|---|----------------------------------------------------------------------------------------------------------------------------|
| patellar recesses.                                                                                                                                                                                                                                                                           |   |                                                                                                                            |
| <b><u>Bakers Cyst.</u></b><br>Note: Record meniscal cysts, ganglion cysts, and other non-specific periarticular cysts in the comments section.                                                                                                                                               | 0 | Normal                                                                                                                     |
|                                                                                                                                                                                                                                                                                              | 1 | Small                                                                                                                      |
|                                                                                                                                                                                                                                                                                              | 2 | Large                                                                                                                      |
| <b><u>Synovitis.</u></b><br>Note: Defined as abnormally increased linear striations within the intrapatellar fat pad and irregular thickening at the margin of the fat pad with the articular cartilage. Low signal on short TE images, and intermediate to high signal on FSE PD FS images. | 0 | Normal                                                                                                                     |
|                                                                                                                                                                                                                                                                                              | 1 | Mild synovitis                                                                                                             |
|                                                                                                                                                                                                                                                                                              | 2 | Moderate to marked synovitis                                                                                               |
| ACL, PCL                                                                                                                                                                                                                                                                                     | 0 | Normal                                                                                                                     |
|                                                                                                                                                                                                                                                                                              | 1 | Significant increased edema within or surrounding the ligament, with normal course and at least some intact fibers present |
|                                                                                                                                                                                                                                                                                              | 2 | Complete tear, acute or chronic                                                                                            |
| MCL, LCL                                                                                                                                                                                                                                                                                     | 0 | Normal ligament with minimal-to-none adjacent edema                                                                        |
|                                                                                                                                                                                                                                                                                              | 1 | Significant periligamentous edema, ligament intact; high signal surrounding ligament with normal signal within it          |
|                                                                                                                                                                                                                                                                                              | 2 | High signal surrounding and within the ligament – Partial tear                                                             |
|                                                                                                                                                                                                                                                                                              | 3 | Complete tear                                                                                                              |

PF = patellofemoral, ACL = anterior cruciate ligament, PCL = posterior cruciate ligament, MCL = medial collateral ligament, LCL = lateral collateral ligament, BME = bone marrow edema; FSE PD FS = fast spin echo, proton density, with fat saturation; and TE = echo time.

Appendix E-2: Description of magnetic resonance imaging (MRI) sequences protocol and MRI feature reading and scoring procedures for Michigan Study of Women's Health Across the Nation.

Knees were imaged at the time of follow-up visit 11 (which occurred during 2007 to 2008) with use of a 3.0-T MR scanner (Philips, Best, The Netherlands) equipped with a commercial knee surface coil or a 1.5-T MR scanner (General Electric Medical Systems, Milwaukee, Wisconsin). Specific sequences included sagittal, coronal, and axial fast spin echo (FSE) proton density (PD) with fat saturation (FS) sequences (repetition time [TR] 4000 msec, echo time [TE] 15 msec, 4-mm thickness), sagittal spin echo (SE) PD (TR 1000 msec, TE 14 msec, 3 mm thickness), and sagittal three-dimensional spoiled gradient echo (SPGR) with FS (TR 38 msec, TE 6.9 msec, flip angle (FA) 45°, 2-mm effective thickness). The field of view (FOV) was optimized between 12 and 14 cm. As the purpose of the study was to assess multiple knee joint structures, the FSE PD FS sequences were chosen to enable tissue contrast between articular cartilage, bone, and fluid while still maintaining a high signal to noise ratio (S/N) for evaluation of periarticular soft tissues<sup>1-4</sup>. Since FSE PD FS sequences are considered suboptimal for meniscal evaluation, the additional sagittal SE short TE sequence contributed to optimal global joint assessment. The SPGR FS images were included for additional assessment of articular cartilage<sup>5</sup>.

MR images of each knee were interpreted in 2007-2008 by two musculoskeletal radiologists utilizing the score sheet (with definitions) attached in Appendix 1. To ensure reproducibility, there was an initial calibration session to generate comparable scored values (n = 20). A rigorous quality-control program was maintained such that 60% of MR images were double-read with agreement (kappa statistic) in excess of 90%. Scoring discrepancies were resolved by consensus. The radiologists were blinded to radiographic and clinical findings. Eleven alert letters were generated to address potentially important incidental findings.

Cartilage defects: Each knee was evaluated for location, severity, and approximate size of cartilage defects in three compartments (medial femorotibial, lateral femorotibial, and patellofemoral) and seven specific surfaces (medial tibial, medial femoral, lateral tibial, lateral femoral, trochlea, medial patellar facet, and lateral patellar facet). Cartilage defects were scored for depth on the basis of the classification adopted by Drapé et al.<sup>6</sup> and across multiple compartments with use of the Noyes arthroscopic system, adapted to MR imaging<sup>7</sup>. Cartilage was graded for each surface as Grade 0, indicating normal; Grade 1, internal signal alteration only; Grade 2, a defect of <50%; Grade 3, a defect of 50% to 99%; Grade 4, 100% defect with no bone ulceration; and Grade 5, 100% defect with bone ulceration. For Grade 5, ulceration was defined as a visible irregularity in the normal contour of the subchondral cortex. Bone marrow lesions or subchondral sclerosis alone was not considered ulceration.



**Subchondral trabecular bone-marrow signal changes:** Bone marrow lesions were defined as focal but noncircumscribed (see cysts, below) areas of abnormal high signal on FSE PD FS images, in a subchondral location. Bone marrow lesions were recorded by site and severity, measured perpendicular to the bone cortex in the following manner, and were graded, with Grade 0 indicating normal; Grade 1, the largest diameter was <1 cm; Grade 2, the largest diameter was 1.01 to 2.0 cm; and Grade 3, the largest diameter was >2.0 cm<sup>4,8</sup>.

**Osteophytes:** Osteophytes were abnormal bone growths arising from the margin of the involved compartment. Tibial spine growths were considered as osteophytes in their respective compartments only if there were definite excrescences as opposed to mere “pointing” of the tibial spines. Osteophytes were graded in each compartment, with Grade 0 indicating no osteophyte; Grade 1, an osteophyte of ≤5 mm; Grade 2, an osteophyte of >5 to 10 mm; and Grade 3, an osteophyte of >10 mm<sup>9</sup>.

**Subchondral cysts:** Cysts were defined as discrete, margined circular or oval areas of hyperintensity on FSE PD FS images in a subchondral location<sup>10</sup>. Cysts had sharp, smoothly circumscribed margins, typically with a hyperintensity similar to synovial fluid. Cysts were graded by compartment, with Grade 0 indicating normal; Grade 1, ≤10 mm; and Grade 2, >10 mm.

**Joint effusion:** Effusions represent substantially greater than expected physiologic amounts of synovial fluid in the lateral or medial patellar recesses exceeding 10 mm in width<sup>11</sup>. They were graded, with Grade 0 indicating physiologic fluid; Grade 1, a small effusion (≤10 mm); and Grade 2, a moderate and/or large effusion (>10 mm).

**Synovitis:** Synovitis was defined as abnormally increased linear or irregular striations within the infrapatellar (Hoffa) fat pad or joint recesses and irregular thickening at the margin of the fat pad with the articular cartilage<sup>12,13</sup>. These changes consisted of low signal on SE short TE images and intermediate-to-high signal on FSE PD FS images. Synovitis was graded, with Grade 0 indicating normal; Grade 1, mild synovitis; and Grade 2, moderate-to-marked synovitis.

**Synovial cysts:** Cysts were fluid-filled collections arising from the joint, extending in the standard fashion (Baker cyst) between the semimembranosus tendon and the medial head of the gastrocnemius muscle, or in a less typical site, if confirmed to be in continuity with the joint<sup>11</sup>. Meniscal cysts, ganglion cysts, and other nonspecific periarticular cysts were recorded but not included in the analysis. Cysts were graded on a semiquantitative scale, with Grade 0 indicating normal; Grade 1, small; and Grade 2, large.

**Ligamentous abnormalities:** Cruciate ligament abnormalities were graded, with Grade 0 indicating normal; Grade 1, increased edema within or surrounding a ligament with normal course and at least some intact fibers present; and Grade 2, a complete tear, acute or chronic. Collateral ligament abnormalities were graded, with Grade 0 indicating a normal ligament with minimal to no adjacent edema; Grade 1, periligamentous edema, with the ligament intact; Grade 2, a partial tear; and Grade 3, a complete tear.

Meniscal abnormalities: Intrameniscal abnormalities as well as frank tears incorporated a modification of the system of Crues et al.<sup>14-16</sup>: Grade 0 indicated normal; Grade 1, intrasubstance (Cruces Grades 1 and 2) meniscal abnormality only; Grade 2, nondisplaced tear (extending to meniscal surface, Cruces Grade 3); and Grade 3, displaced or macerated tear. Meniscal extrusion was measured on the coronal MR images from the outer edge of the tibia (not including osteophytes) to the outer edge of the meniscus.

## References

### 1.

Harned EM, Mitchell DG, Burk DL Jr, Vinitski S, Rifkin MD. Bone marrow findings on magnetic resonance images of the knee: accentuation by fat suppression. *Magn Reson Imaging*. 1990;8:27-31.

### 2.

Potter HG, Linklater JM, Allen AA, Hannafin JA, Haas SB. Magnetic resonance imaging of articular cartilage in the knee. An evaluation with use of fast-spin-echo imaging. *J Bone Joint Surg Am*. 1998;80:1276-84.

### 3.

Bredella MA, Tirman PF, Peterfy CG, Zarlingo M, Feller JF, Bost FW, Belzer JP, Wischer TK, Genant HK. Accuracy of T2-weighted fast spin-echo MR imaging with fat saturation in detecting cartilage defects in the knee: comparison with arthroscopy in 130 patients. *AJR Am J Roentgenol*. 1999;172:1073-80.

### 4.

Lal NR, Jamadar DA, Doi K, Newman JS, Adler RS, Uri DS, Kazerooni EA. Evaluation of bone contusions with fat-saturated fast spin-echo proton-density magnetic resonance imaging. *Can Assoc Radiol J*. 2000;51:182-5.

### 5.

Recht MP, Piraino DW, Paletta GA, Schils JP, Belhobek GH. Accuracy of fat-suppressed three-dimensional spoiled gradient-echo FLASH MR imaging in the detection of patellofemoral articular cartilage abnormalities. *Radiology*. 1996;198:209-12.

### 6.

Drapé JL, Pessis E, Auleley GR, Chevrot A, Dougados M, Ayrat X. Quantitative MR imaging evaluation of chondropathy in osteoarthritic knees. *Radiology*. 1998;208:49-55.

### 7.

Noyes FR, Stabler CL. A system for grading articular cartilage lesions at arthroscopy. *Am J Sports Med*. 1989;17:505-13.

### 8.

Zanetti M, Bruder E, Romero J, Hodler J. Bone marrow edema pattern in osteoarthritic knees: correlation between MR imaging and histologic findings. *Radiology*. 2000;215:835-40.

### 9.

Boegård T, Rudling O, Petersson IF, Jonsson K. Correlation between radiographically diagnosed osteophytes and magnetic resonance detected cartilage defects in the tibiofemoral joint. *Ann Rheum Dis*. 1998;57:401-7.

**10.**

Tschirch FT, Schmid MR, Pfirrmann CW, Romero J, Hodler J, Zanetti M. Prevalence and size of meniscal cysts, ganglionic cysts, synovial cysts of the popliteal space, fluid-filled bursae, and other fluid collections in asymptomatic knees on MR imaging. *AJR Am J Roentgenol.* 2003;180:1431-6.

**11.**

Hill CL, Gale DG, Chaisson CE, Skinner K, Kazis L, Gale ME, Felson DT. Knee effusions, popliteal cysts, and synovial thickening: association with knee pain in osteoarthritis. *J Rheumatol.* 2001;28:1330-7.

**12.**

Schweitzer ME, Falk A, Pathria M, Brahme S, Hodler J, Resnick D. MR imaging of the knee: can changes in the intracapsular fat pads be used as a sign of synovial proliferation in the presence of an effusion? *AJR Am J Roentgenol.* 1993;160:823-6.

**13.**

Fernandez-Madrid F, Karvonen RL, Teitge RA, Miller PR, An T, Negendank WG. Synovial thickening detected by MR imaging in osteoarthritis of the knee confirmed by biopsy as synovitis. *Magn Reson Imaging.* 1995;13:177-83.

**14.**

Crues JV 3rd, Mink J, Levy TL, Lotysch M, Stoller DW. Meniscal tears of the knee: accuracy of MR imaging. *Radiology.* 1987;164:445-8.

**15.**

Adams JG, McAlindon T, Dimasi M, Carey J, Eustace S. Contribution of meniscal extrusion and cartilage loss to joint space narrowing in osteoarthritis. *Clin Radiol.* 1999;54:502-6.

**16.**

Gale DR, Chaisson CE, Totterman SM, Schwartz RK, Gale ME, Felson D. Meniscal subluxation: association with osteoarthritis and joint space narrowing. *Osteoarthritis Cartilage.* 1999;7:526-32.
